# Supplementary material for: The Relationship between Hydrophobicity and Drug-Protein Binding in Human Serum Albumin: A Quartz Crystal Microbalance Study
Source: MDPI journal article supplement (doi:10.3390/biophysica2020012), 2022-05-23
Supplement: s1 [file s1]

Archive with 1 entries (1 files):
- biophysica-1702530-supplementary.pdf
