# Supplementary material for: The Relationship between Hydrophobicity and Drug-Protein Binding in Human Serum Albumin: A Quartz Crystal Microbalance Study
Source: MDPI journal article supplement (doi:10.3390/biophysica2020012), 2022-05-23

Mass data for our tested drugs. Y axis is mass in  $\text{ng}/\text{cm}^2$  and X axis is time in seconds.

**Caffeine F2**

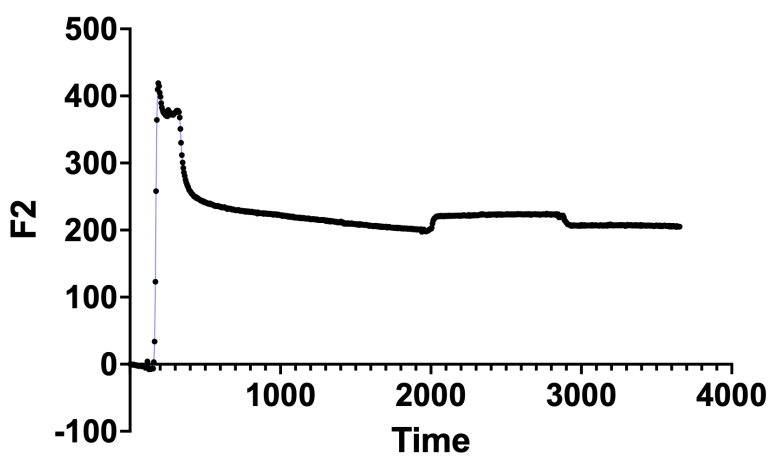

**Acetaminophen F2**

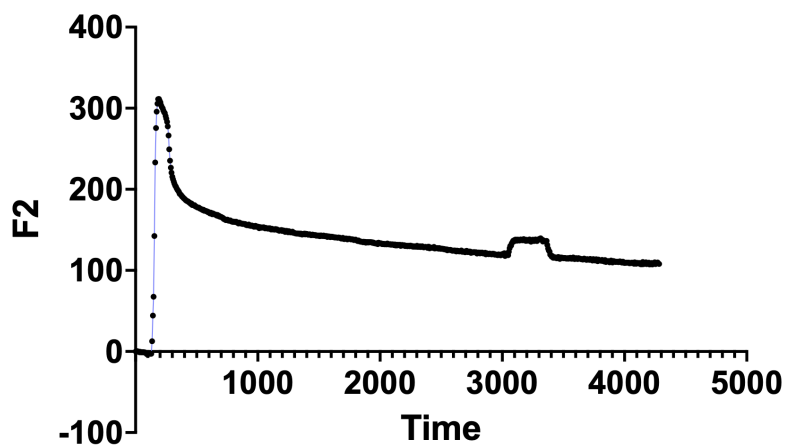

**Metronidazole F2**

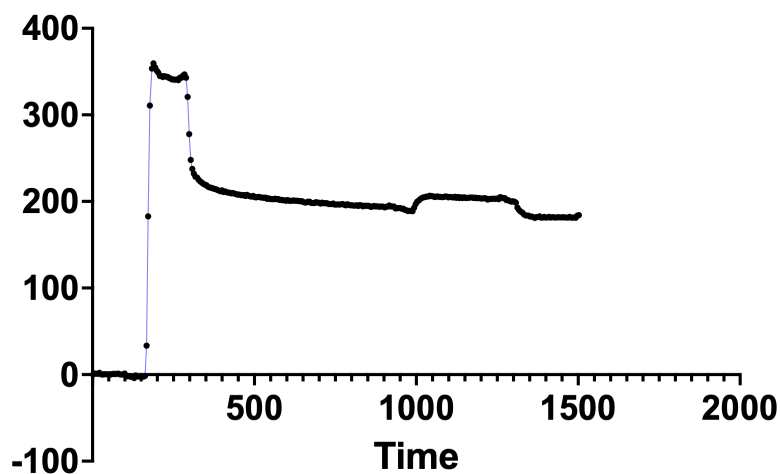

**Theophylline 1**

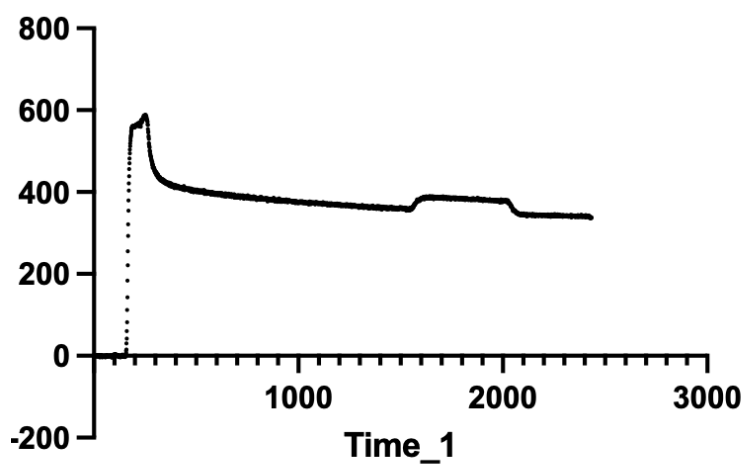

**Cimetidine F2**

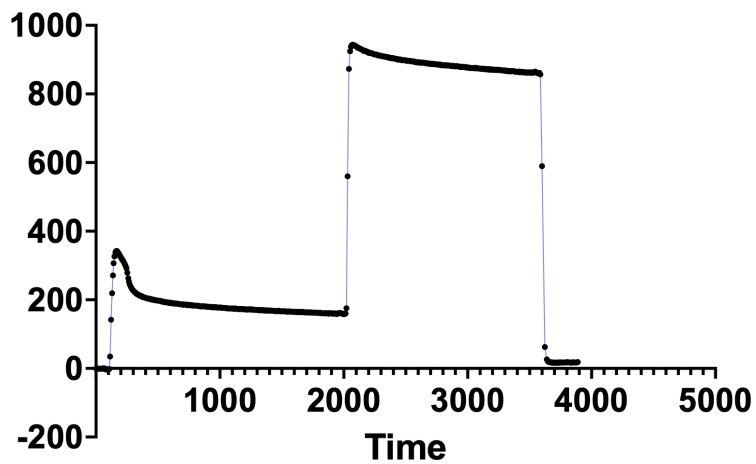

2

**Metroprolol 1**

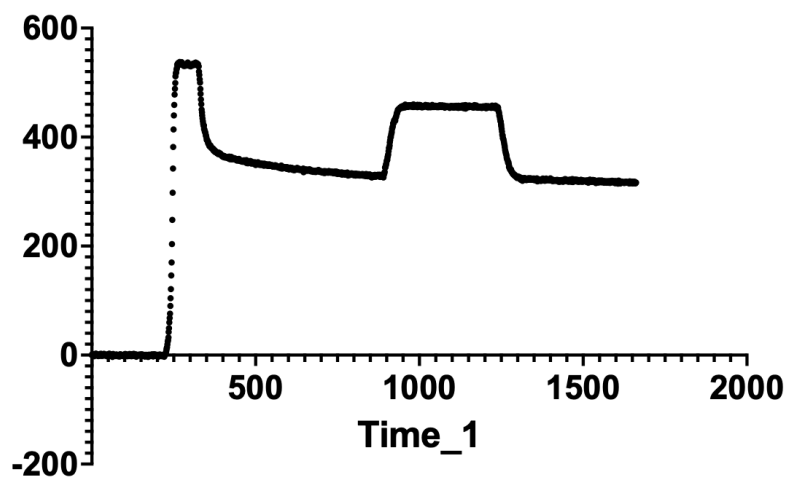

**Procaine F1**

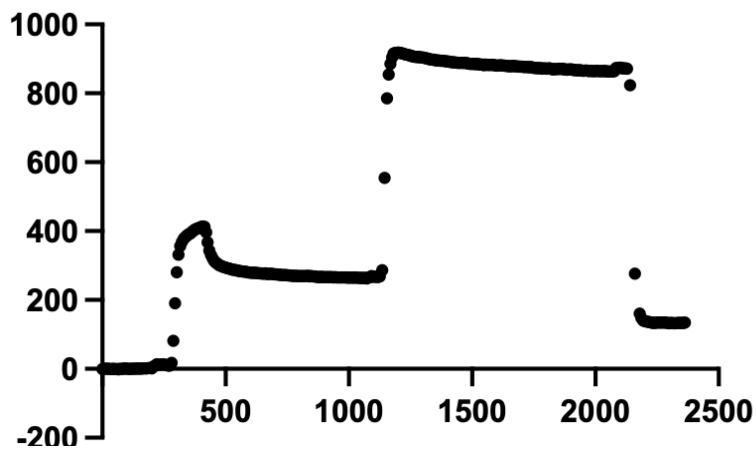

**Guaifenesin F2**

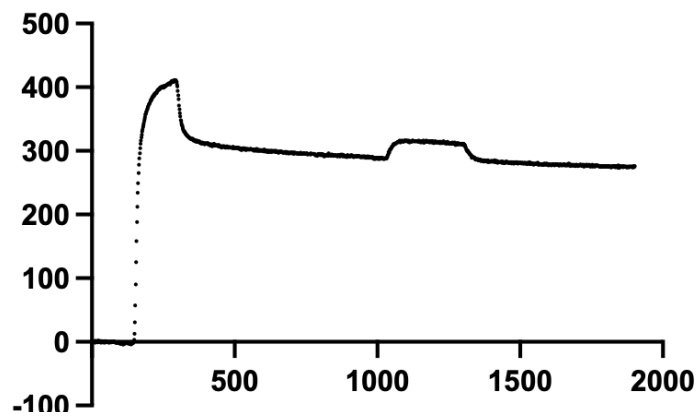

**Propanolol 3**

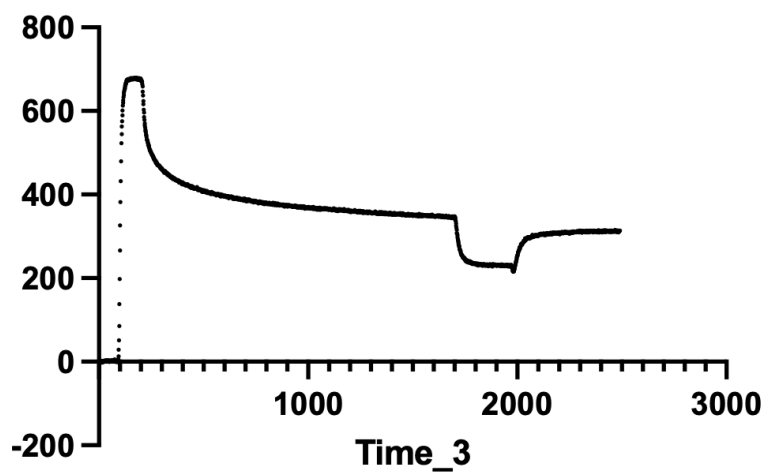

**Scopolamine 1**

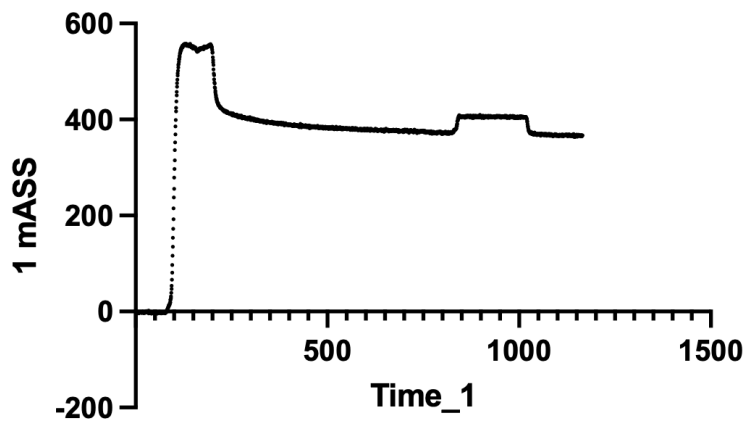

**Desipramine 3**

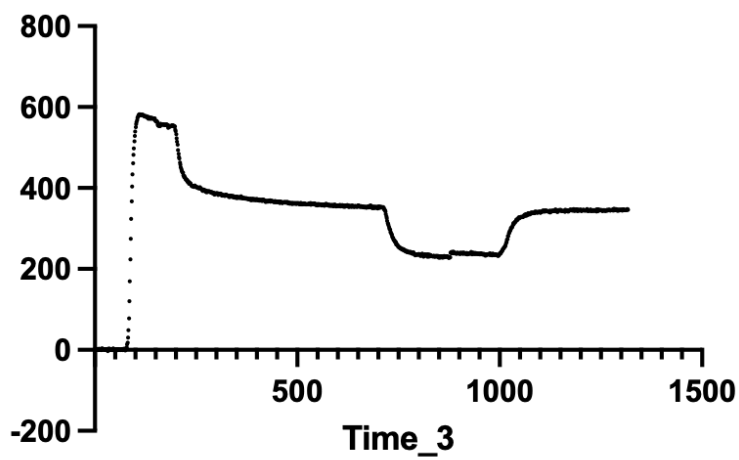

Supplement: s1 [file s1 › biophysica-1702530-supplementary.pdf]
